# Supplementary material for: A pan-cancer analysis of collagen VI family on prognosis, tumor microenvironment, and its potential therapeutic effect
Source: PubMed Central journal article supplement (PMC9513866; doi:10.1186/s12859-022-04951-0), 2022-09-27

**Additional file 2.** Collagen VI family expression in normal tissues based on the HPA database.

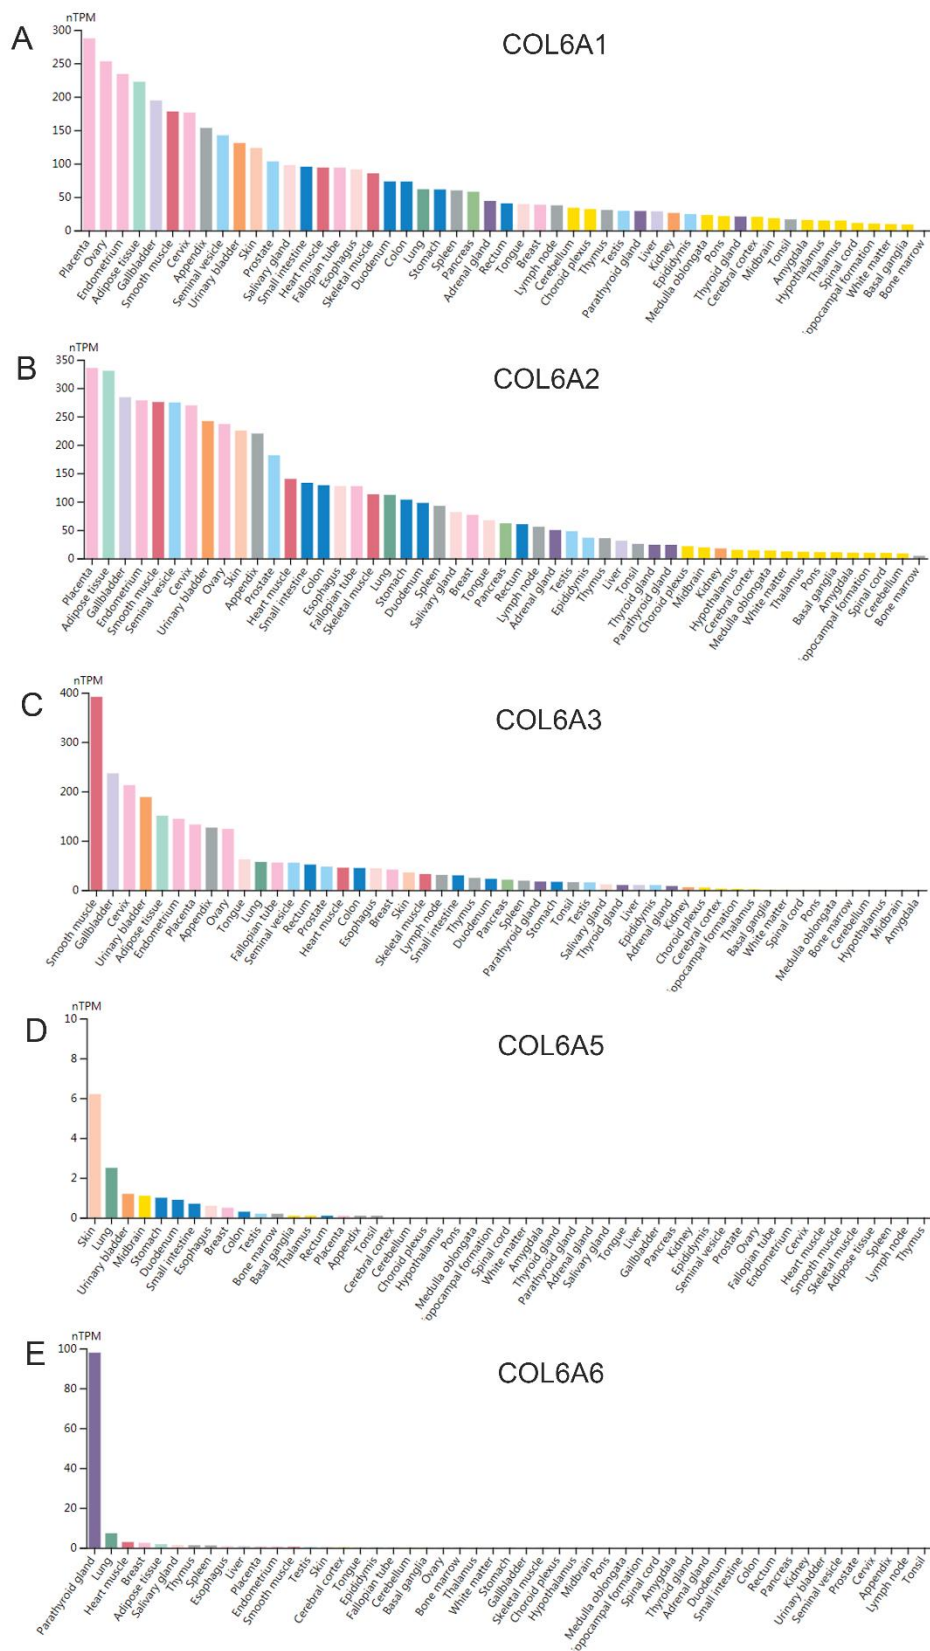

Supplement: 12859_2022_4951_MOESM2_ESM.pdf [file 12859_2022_4951_MOESM2_ESM.pdf]
