# Supplementary material for: A pan-cancer analysis of collagen VI family on prognosis, tumor microenvironment, and its potential therapeutic effect
Source: PubMed Central journal article supplement (PMC9513866; doi:10.1186/s12859-022-04951-0), 2022-09-27

**Additional file 4.** The miRNA-regulated network of collagen VI family. Pink nodes represent target genes, and green nodes represent miRNAs.

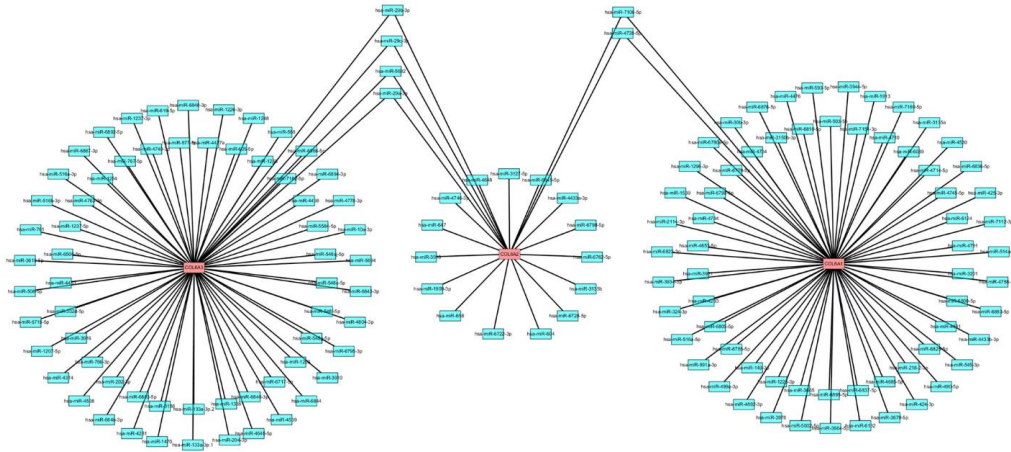

Supplement: 12859_2022_4951_MOESM4_ESM.pdf [file 12859_2022_4951_MOESM4_ESM.pdf]
